# Supplementary material for: Multifaceted Shape Memory Polymer Technology for Biomedical Application: Combining Self-Softening and Stretchability Properties
Source: MDPI journal article supplement (doi:10.3390/polym15214226), 2023-10-25
Supplement: s1 [file s1]

## Mechanical tensile testing

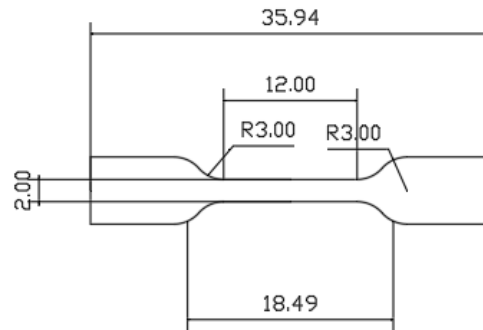

**Figure S1.** Specimen dimensions per ISO 572-2 (5B) for tensile testing. All dimensions are in mm.

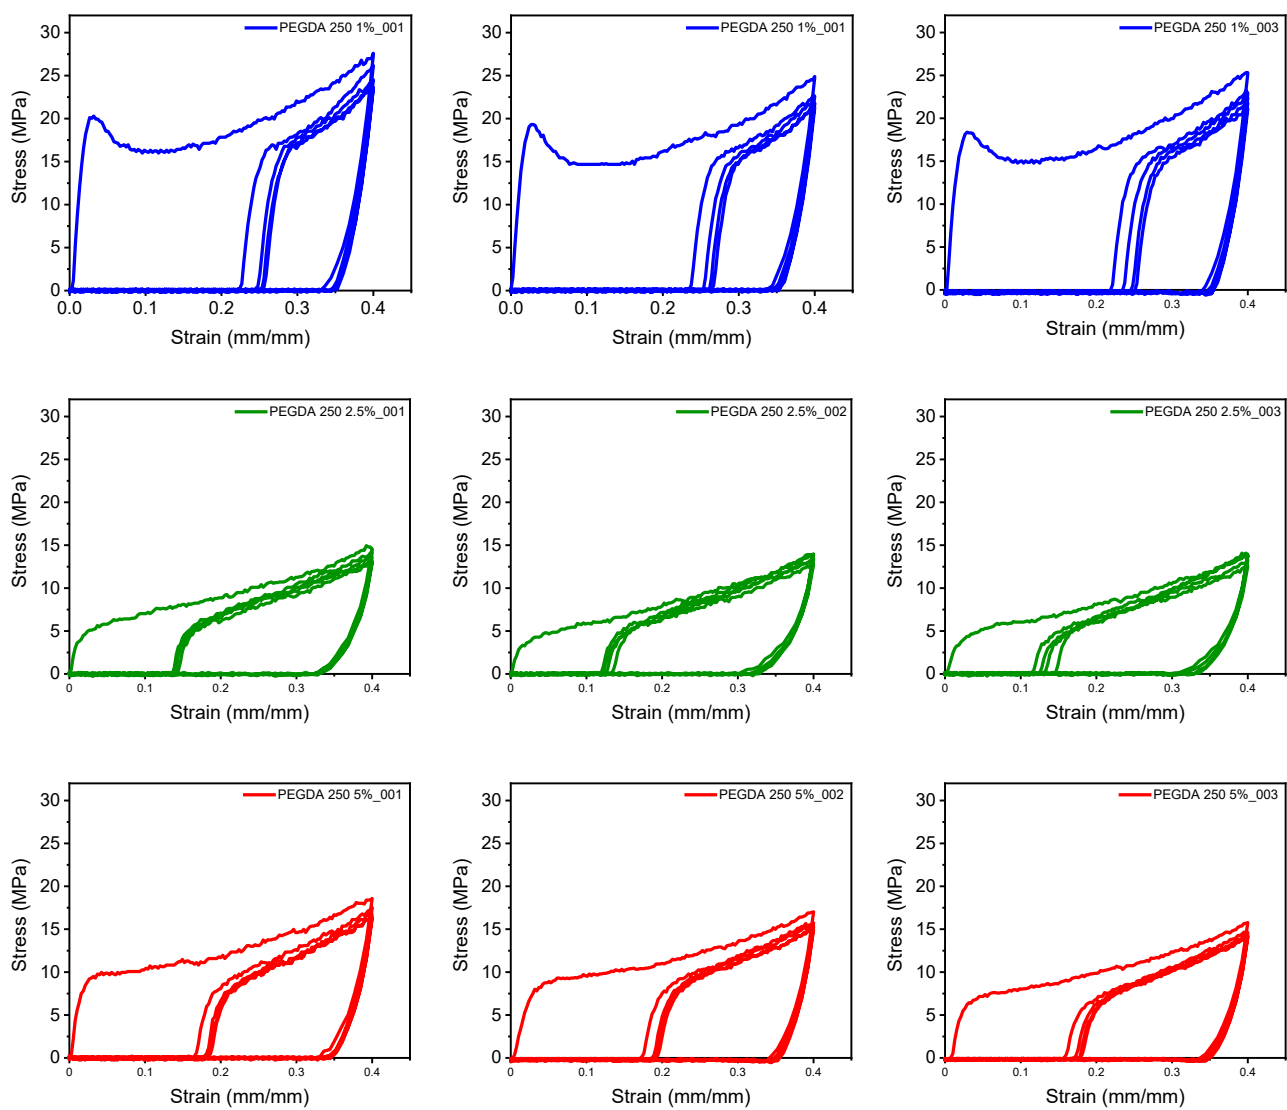

**Figure S2.** Cyclic testing of 3 replicates of each polymer composition with PEGDA 250 (Strain to 40%).

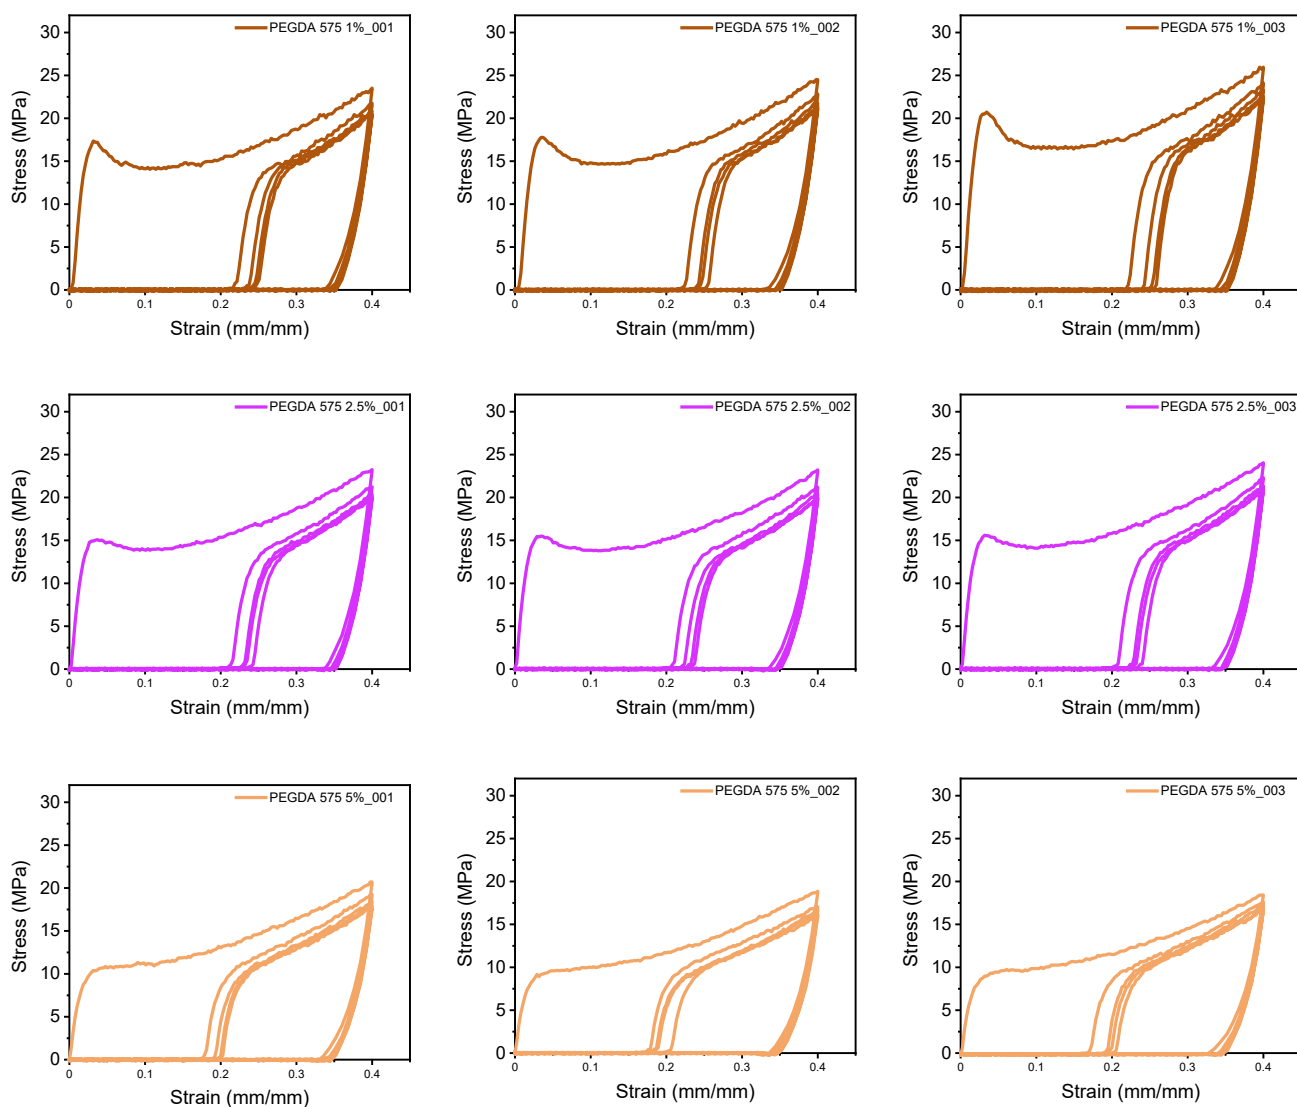

**Figure S3.** Cyclic testing of 3 replicates of each polymer composition with PEGDA 575 (Strain to 40%).

# Thermomechanical Test

**Table S1.** Comparison of  $T_g$  and storage modulus at different temperatures for different polymer compositions in dry condition.

| Polymer Composition | $T_g$ (°C) (Dry) | Glassy modulus at $<T_g$<br>(10 °C)<br>(MPa) | Storage Modulus at<br>37 °C<br>(MPa) | Rubbery modulus<br>at $>T_g$ (50 °C)<br>(MPa) |
|---------------------|------------------|----------------------------------------------|--------------------------------------|-----------------------------------------------|
| TATATO/TMTMP        | 31.2 ± 1.7       | 1711.4 ± 277.7                               | 31.0 ± 7.6                           | 16.4 ± 5.1                                    |
| PEGDA 250 1%        | 29.7 ± 0.4       | 2282.5 ± 120.5                               | 26.5 ± 2.2                           | 12.5 ± 1.1                                    |
| PEGDA 250 2.5%      | 28.7 ± 1.0       | 2114.05 ± 46.7                               | 21.1 ± 3.3                           | 11.76 ± 3.7                                   |
| PEGDA 250 5%        | 27.0 ± 0.03      | 2138.3 ± 34.7                                | 20.8 ± 0.4                           | 11.7 ± 0.4                                    |
| PEGDA 575 1%        | 29.2 ± 0.3       | 1876.04 ± 87.9                               | 17.7 ± 3.2                           | 9.2 ± 2.7                                     |
| PEGDA 575 2.5%      | 28.0 ± 0.6       | 3425.9 ± 2119                                | 36.1 ± 22.9                          | 19.7 ± 16.6                                   |
| PEGDA 575 5%        | 26.0 ± 0.6       | 1839 ± 90.3                                  | 18.3 ± 0.6                           | 12.4 ± 1.3                                    |

**Table S2.** Comparison of  $T_g$  and storage modulus at different temperatures for different polymer compositions in soaked condition.

| Polymer Composition | $T_g$ (°C) (Soaked) | Glassy Modulus $<T_g$<br>(10 °C)<br>(MPa) | Storage Modulus at<br>37 °C<br>(MPa) | Rubbery Modulus $>T_g$<br>(50 °C)<br>(MPa) |
|---------------------|---------------------|-------------------------------------------|--------------------------------------|--------------------------------------------|
| TATATO/TMTMP        | 21.8 ± 0.5          | 1374.5 ± 44.7                             | 13.1 ± 0.02                          | 13.5 ± 4.4                                 |
| PEGDA 250 1%        | 21.1 ± 0.8          | 1384.9 ± 167.0                            | 12.8 ± 6.4                           | 11.6 ± 5.3                                 |
| PEGDA 250 2.5%      | 21.4 ± 0.8          | 1370.9 ± 100.2                            | 11.9 ± 4.4                           | 12.0 ± 5.1                                 |
| PEGDA 250 5%        | 18.8 ± 0.6          | 943.6 ± 64.4                              | 11.3 ± 4.4                           | 11.7 ± 4.7                                 |
| PEGDA 575 1%        | 22.0 ± 0.1          | 1437.7 ± 31.3                             | 9.3 ± 6.2                            | 9.1 ± 6.6                                  |
| PEGDA 575 2.5%      | 20.4 ± 0.4          | 1224.3 ± 121.4                            | 13.0 ± 3.0                           | 10.3 ± 1.1                                 |
| PEGDA 575 5%        | 17.4 ± 0.4          | 708.4 ± 101.1                             | 7.9 ± 5.7                            | 8.2 ± 3.0                                  |

## Shape Memory Characterization

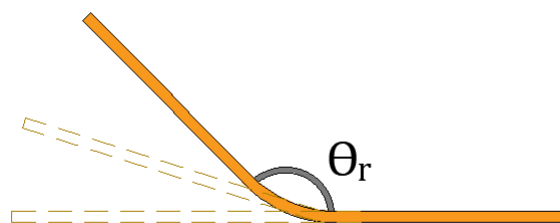

**Figure S4.** Shape recovery mechanism of the polymer.  $\theta_r$  represents the shape recovery angle for the calculation of shape recovery %.

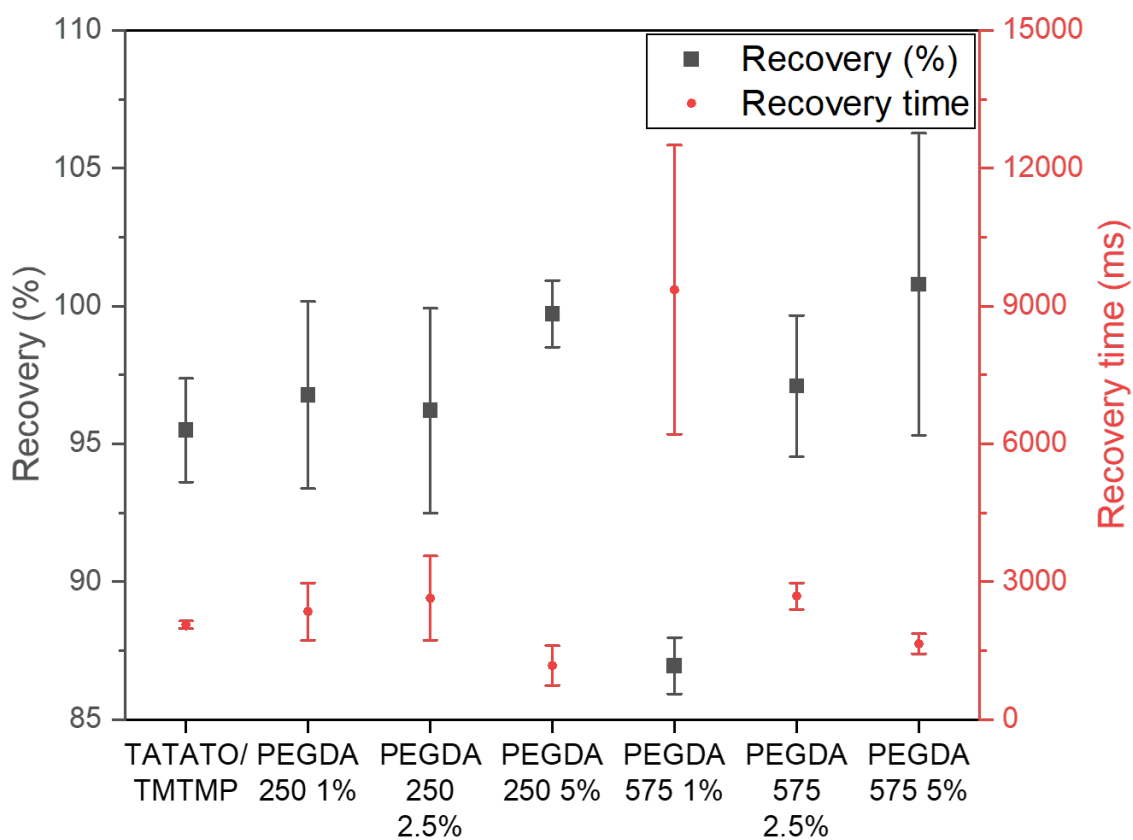

**Figure S5.** Qualitative SMP analysis. Plot demonstrating the shape recovery % and recovery time for all the polymer compositions. .

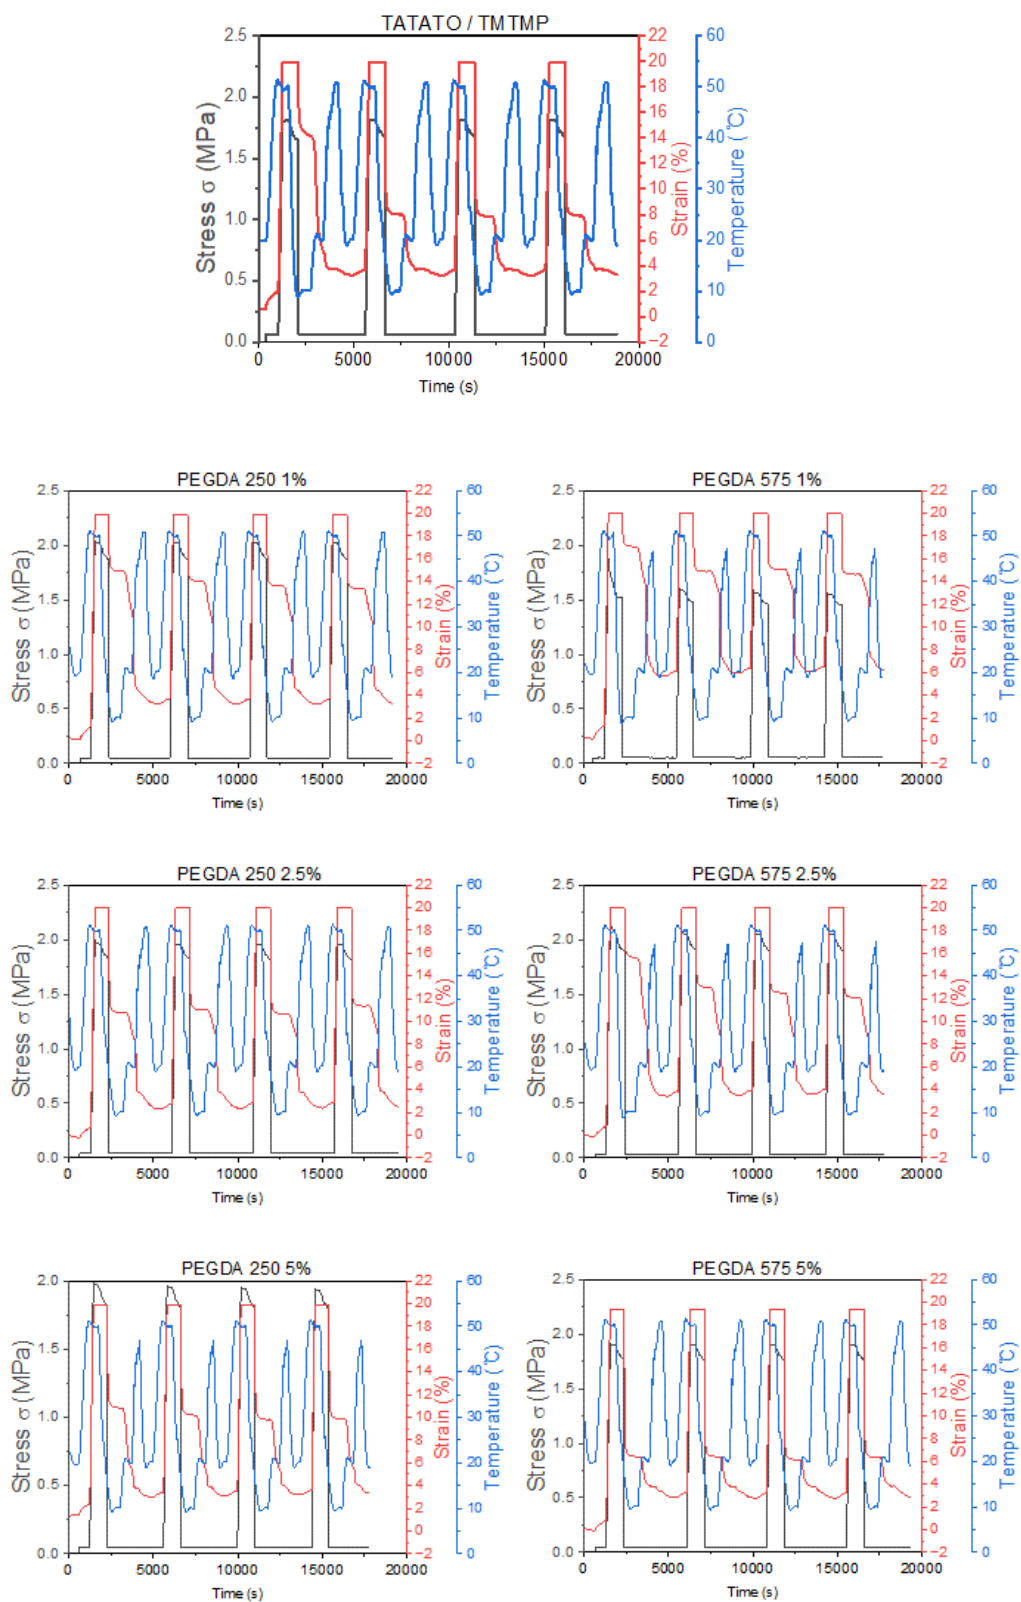

**Figure S6.** Representative shape memory test data results from DMA 850 for all the polymer groups.

**Table S3.** Calculation of shape fixity and shape recovery for the first and second cycle.

|                   | TATATO / TMTMP |           | PEGDA 250 1% |         | PEGDA 250 2.5% |         | PEGDA 250 5% |         | PEGDA 575 1% |         | PEGDA 575 2.5% |         | PEGDA 575 5% |         |
|-------------------|----------------|-----------|--------------|---------|----------------|---------|--------------|---------|--------------|---------|----------------|---------|--------------|---------|
|                   | 1st cycle      | 2nd cycle | 1            | 2       | 1              | 2       | 1            | 2       | 1            | 2       | 1              | 2       | 1            | 2       |
| L_unload at 10    | 17.904         | 16.8783   | 17.9295      | 17.7905 | 17.1762        | 17.2131 | 18.2578      | 18.1545 | 21.1188      | 20.7227 | 19.3958        | 18.9574 | 16.448       | 16.447  |
| L_unload at 20    | 16.4887        | 16.2876   | 17.5121      | 17.413  | 16.8377        | 16.9353 | 17.4097      | 17.3938 | 20.6108      | 20.4415 | 18.4389        | 18.3287 | 16.0712      | 16.0638 |
| L_max             | 18.7332        | 18.7332   | 18.7025      | 18.7025 | 18.6033        | 18.6033 | 19.7504      | 19.7504 | 21.646       | 21.646  | 20.1341        | 20.1341 | 18.4559      | 18.4559 |
| L recovered at 20 | 16.1346        | 16.1313   | 16.1123      | 16.1077 | 15.8611        | 15.8696 | 16.9715      | 16.9886 | 19.0662      | 19.1154 | 17.358         | 17.3741 | 15.8932      | 15.8875 |
| L initial at 20   | 15.7598        | 16.1304   | 15.6252      | 16.1123 | 15.4704        | 15.8611 | 16.7189      | 16.9715 | 18.0857      | 19.0627 | 16.7657        | 17.3522 | 15.4593      | 15.8889 |

Cycle to cycle

Fixity @10C 95.573634 90.09833 95.86686 95.12365 92.32878 92.52713 92.44268 91.91966 97.56445 95.73455 96.33309 94.15569 89.12055 89.115134

Recovery @ 20C 87.394901 99.96542 84.17119 100.1776 87.52913 99.69003 91.66749 99.38465 72.46019 97.95997 82.41598 99.21277 85.52026 100.05454
